# Supplementary material for: Cholesterol-terminated cationic lipidated oligomers (CLOs) as a new class of antifungals
Source: Royal Society of Chemistry journal article supplement (doi:10.1039/d4tb02317j), 2025-01-01
Supplement: d4tb02317j1.pdf [file d4tb02317j1.pdf]

## **Cholesterol-terminated cationic lipidated oligomers (CLOs) as a new class of antifungals**

Muhammad Bilal Hassan Mahboob <sup>a</sup>, Santhni Subramaniam <sup>b</sup>, Jessica R. Tait <sup>a</sup>, James L. Grace <sup>a</sup>, Alysha G. Elliott <sup>d</sup>, Holly Floyd <sup>d</sup>, Johannes Zuegg <sup>d</sup>, John F. Quinn <sup>a,c</sup>, Clive A. Prestidge <sup>b\*</sup>, Cornelia B. Landersdorfer <sup>a\*</sup>, Michael R. Whittaker <sup>a,\*</sup>.

<sup>a</sup> Drug Delivery, Disposition, and Dynamics Theme, Monash Institute of Pharmaceutical Sciences, Monash University, 381 Royal Pde, Parkville, VIC, 3052, Australia.

<sup>b</sup> University of South Australia, UniSA Clinical and Health Sciences, SA 5000, Australia.

<sup>c</sup> Department of Chemical and Biological Engineering, Faculty of Engineering, Monash University, Clayton, Victoria 3800, Australia.

<sup>d</sup> Institute of Molecular Biosciences, The University of Queensland, Brisbane, QLD, 4072, Australia.

\*Address correspondence to:

[michael.whittaker@monash.edu](mailto:michael.whittaker@monash.edu)

[cornelia.landorsdorfer@monash.edu](mailto:cornelia.landorsdorfer@monash.edu)

[clive.prestidge@unisa.edu.au](mailto:clive.prestidge@unisa.edu.au)

## Supplementary Information

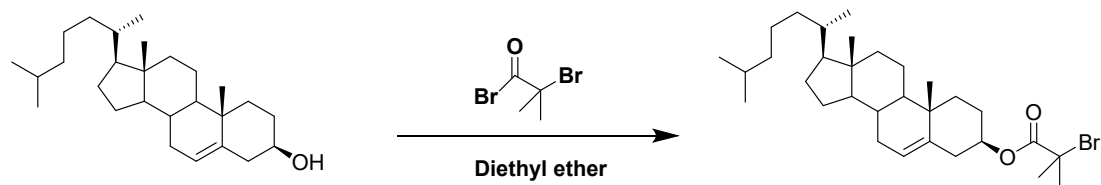

**SI Scheme 1:** Synthesis of Cholesterol Initiator (Chol-Br).

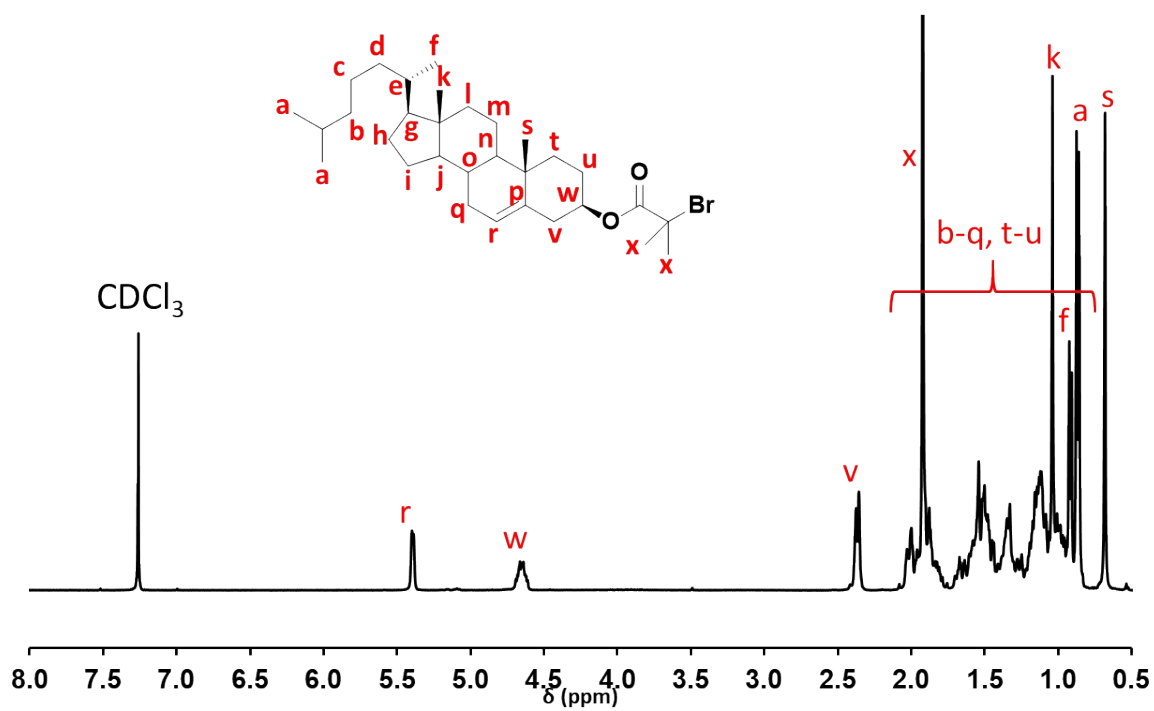

**Figure SI 1:**  $^1\text{H}$  NMR spectra of Cholesterol Initiator (Chol-Br).  $^1\text{H}$  NMR was conducted in  $\text{CDCl}_3$ .

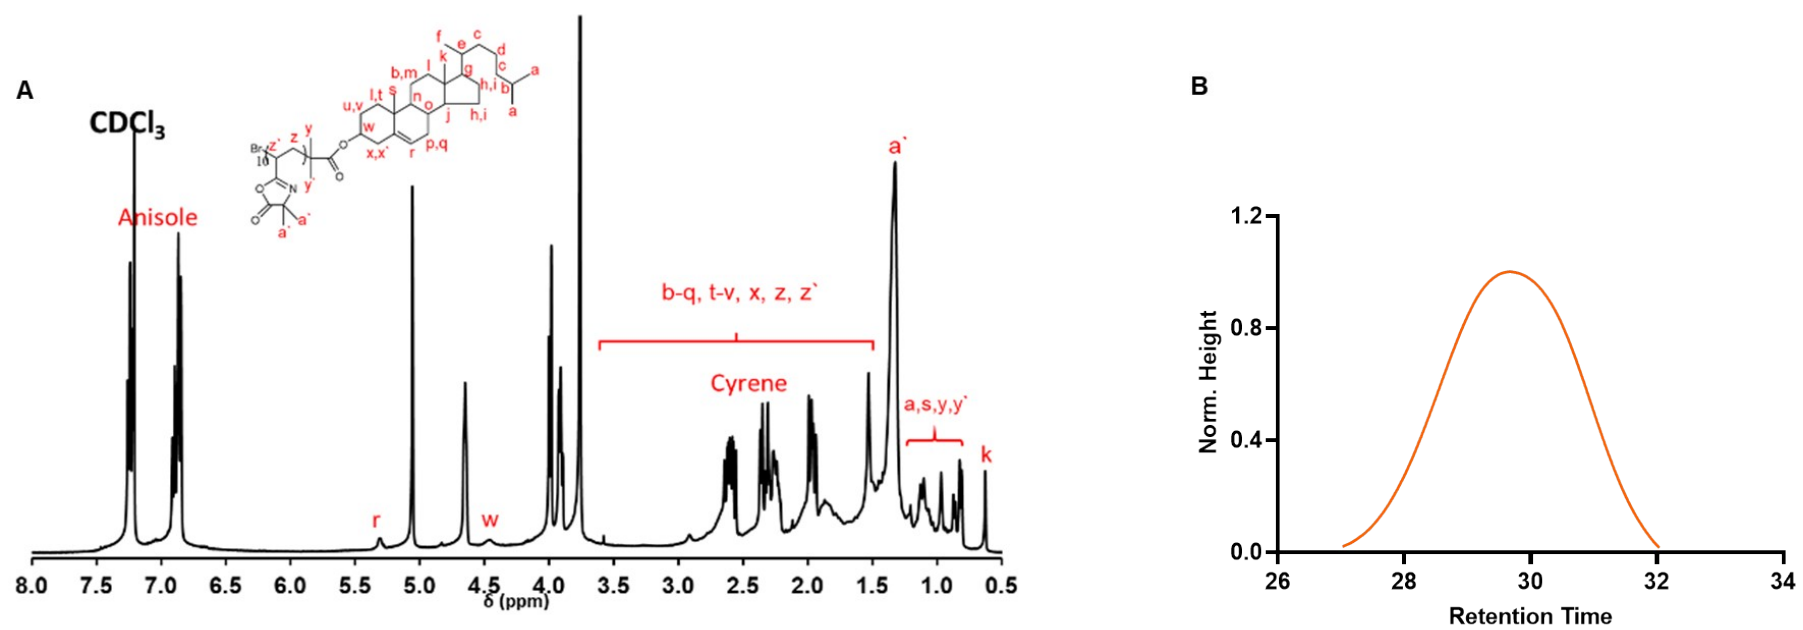

**Figure SI 2:** (A)  $^1\text{H}$  NMR spectra of precursor oligomer Chol-VDM.  $^1\text{H}$  NMR was conducted in  $\text{CDCl}_3$ . (B) Molecular weight distribution over the time (min) for Cholesterol oligomers (DP-10).

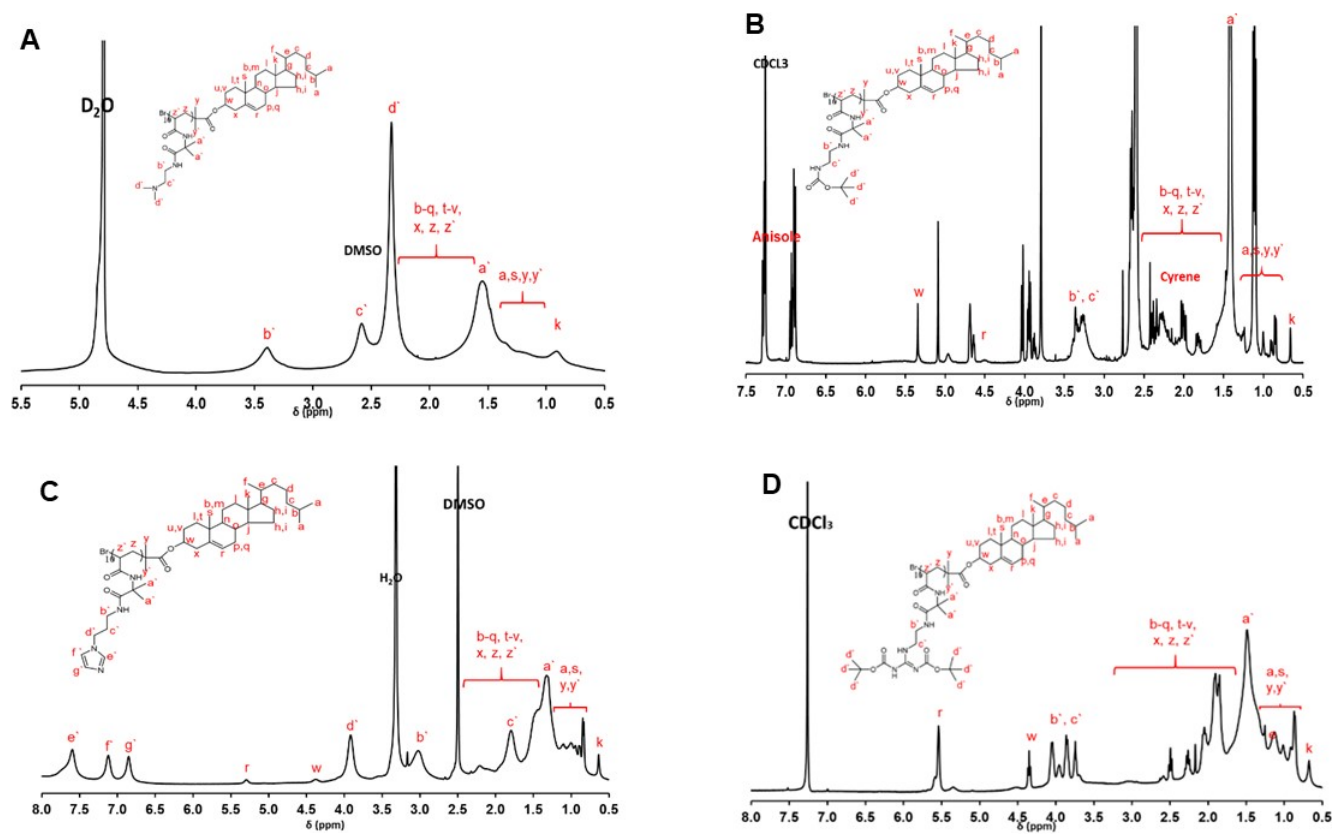

**Figure SI 3:**  $^1\text{H}$  NMR spectra of Chol-VDM ring-opened utilizing A) *N,N*-dimethylethylenediamine (DMEN); B) *N*-Boc-ethylenediamine (BEDA); C) 1-(3-aminopropyl) imidazole (IMID); D) 2-(2-aminoethyl)-1,3-di-Boc-guanidine (BG).  $^1\text{H}$  NMR spectra were recorded in  $\text{D}_2\text{O}$  for A,  $\text{CDCl}_3$  for B and D, and  $\text{DMSO-d}_6$  for C.

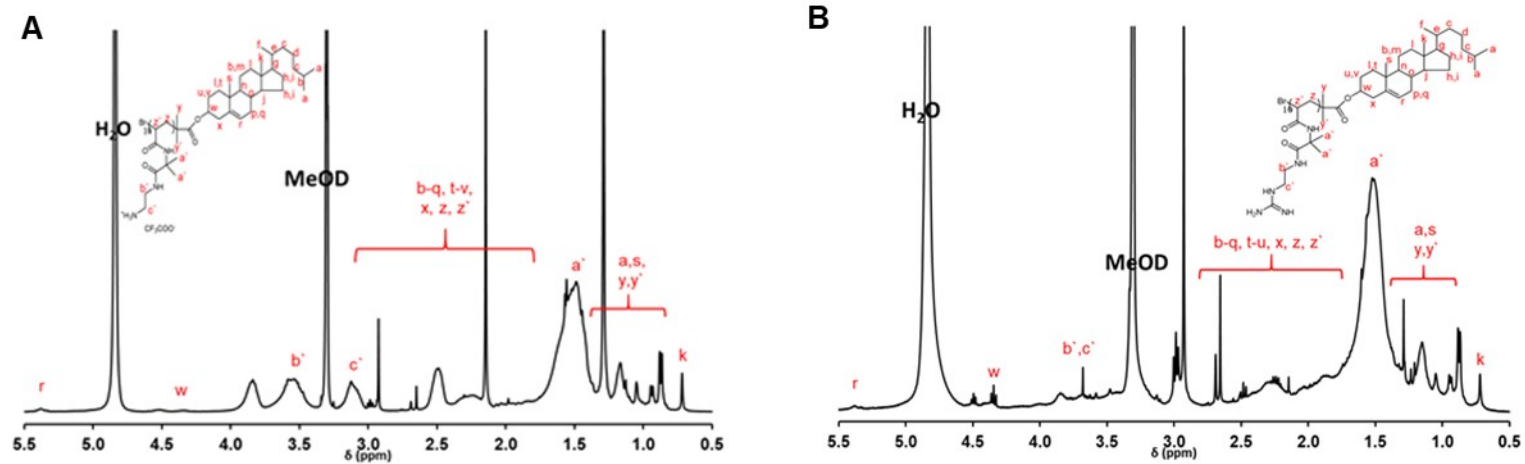

**Figure SI 4:**  $^1\text{H}$  NMR spectra of deprotected oligomers; A) Chol-VDM(BEDA)-D; B) Chol-VDM(BG)-D.  $^1\text{H}$  NMR spectra were recorded in MeOD.

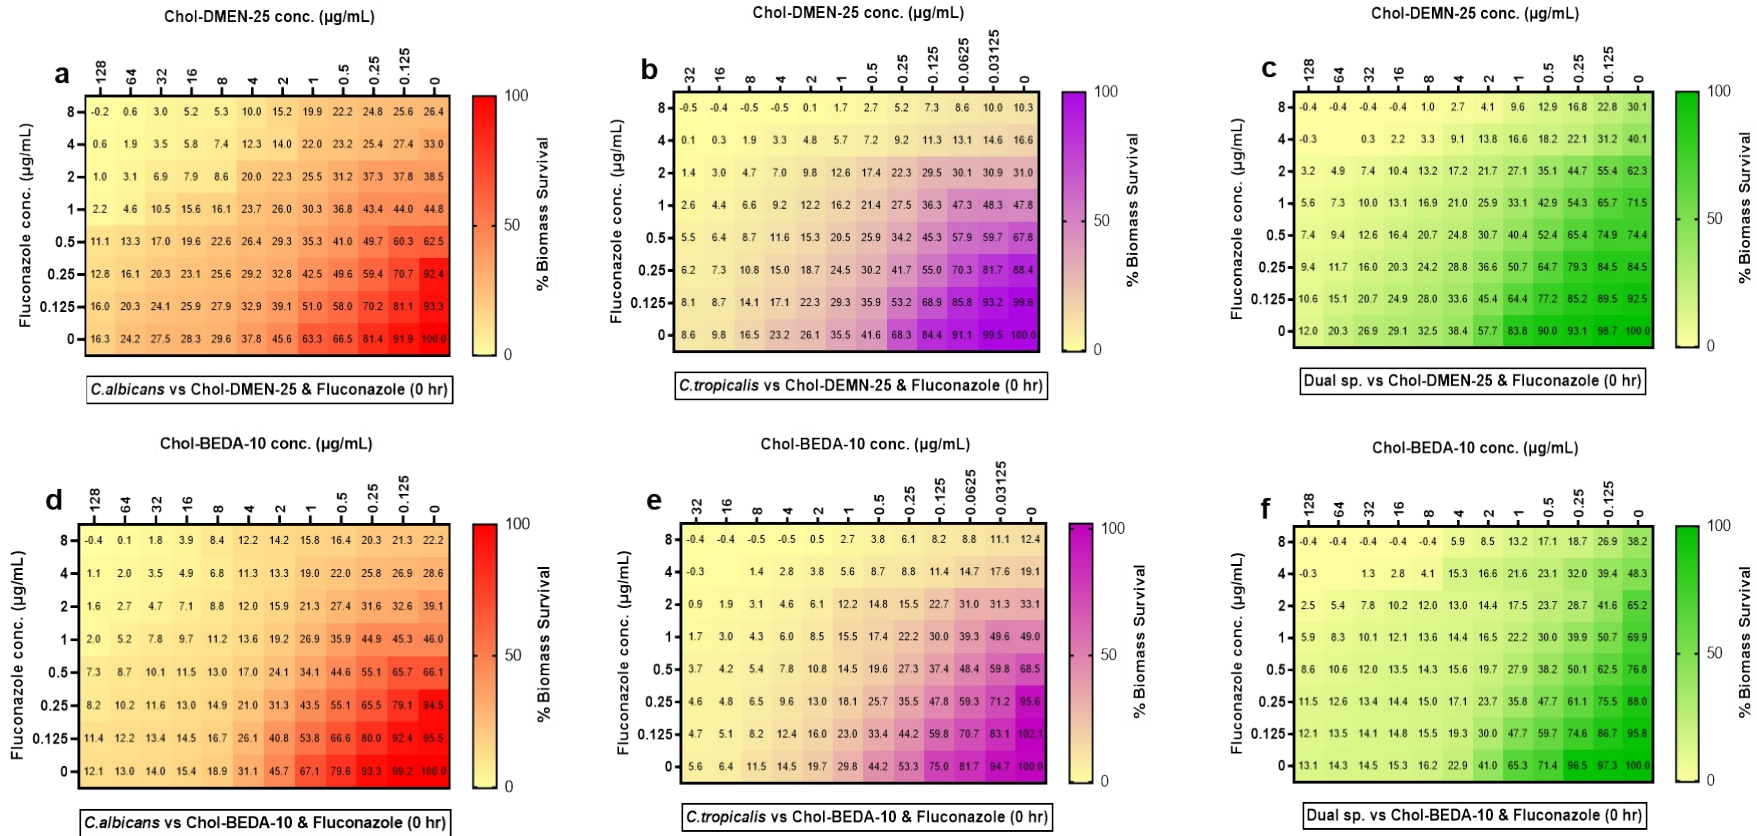

**Figure SI 5:** Checkerboards depicting fungal (*C. albicans*, *C. tropicalis*, and dual sp.) % biomass survival. a) Chol-DMEN-25(128  $\mu\text{g/mL}$  - 0.125  $\mu\text{g/mL}$ ) vs Fluconazole (8  $\mu\text{g/mL}$  - 0.125  $\mu\text{g/mL}$ ) against *C. albicans* planktonic cells. b) Chol-DMEN-25(32  $\mu\text{g/mL}$  - 0.031  $\mu\text{g/mL}$ ) vs Fluconazole (8  $\mu\text{g/mL}$  - 0.125  $\mu\text{g/mL}$ ) against *C. tropicalis* planktonic cells. c) Chol-DMEN-25(32  $\mu\text{g/mL}$  - 0.031  $\mu\text{g/mL}$ ) vs Fluconazole (8  $\mu\text{g/mL}$  - 0.125  $\mu\text{g/mL}$ ) against dual sp. planktonic cells. d) Chol-BEDA-10 (128  $\mu\text{g/mL}$  - 0.125  $\mu\text{g/mL}$ ) vs Fluconazole (8  $\mu\text{g/mL}$  - 0.125  $\mu\text{g/mL}$ ) against *C. albicans* planktonic cells. e) Chol-BEDA-10 (32  $\mu\text{g/mL}$  - 0.031  $\mu\text{g/mL}$ ) vs Fluconazole (8  $\mu\text{g/mL}$  - 0.125  $\mu\text{g/mL}$ ) against *C. tropicalis* planktonic cells. f) Chol-BEDA-10 (128  $\mu\text{g/mL}$  - 0.125  $\mu\text{g/mL}$ ) vs Fluconazole (8  $\mu\text{g/mL}$  - 0.125  $\mu\text{g/mL}$ ) against dual sp. planktonic cells.

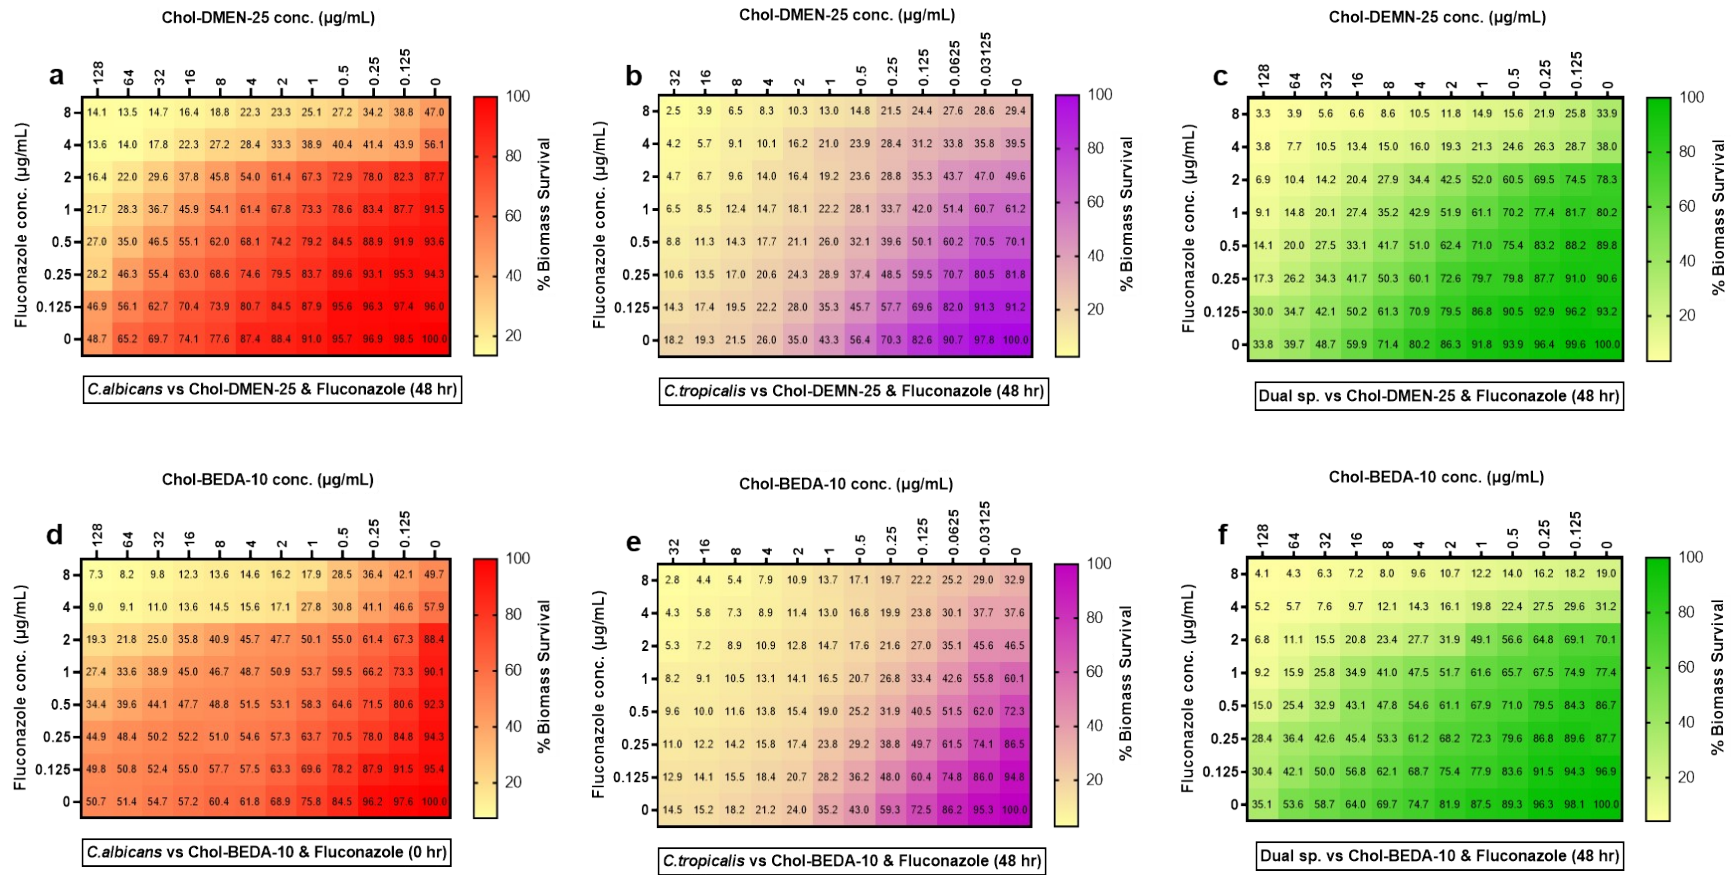

**Figure SI 6:** Checkerboards depicting fungal (*C. albicans*, *C. tropicalis*, and dual sp.) mature biofilm % biomass survival. a) Chol-DMEN-25(128 µg/mL - 0.125 µg/mL) vs Fluconazole (8 µg/mL - 0.125 µg/mL) against *C. albicans* biofilm. b) Chol-DMEN-25 (32 µg/mL - 0.031 µg/mL) vs Fluconazole (8 µg/mL - 0.125 µg/mL) against *C. tropicalis* biofilm. c) Chol-DMEN-25(32 µg/mL - 0.031 µg/mL) vs Fluconazole (8 µg/mL - 0.125 µg/mL) against dual sp. biofilm. d) Chol-BEDA-10 (128 µg/mL - 0.125 µg/mL) vs Fluconazole (8 µg/mL - 0.125 µg/mL) against *C. albicans* biofilm. e) Chol-BEDA-10 (32 µg/mL - 0.031 µg/mL) vs Fluconazole (8 µg/mL - 0.125 µg/mL) against *C. tropicalis* biofilm. f) Chol-BEDA-10 (128 µg/mL - 0.125 µg/mL) vs Fluconazole (8 µg/mL - 0.125 µg/mL) against dual sp. biofilm.

**Table SI 1: Solvents used for NMR**

| <b>CLOs Series</b> | <b><sup>1</sup>H NMR Solvents</b> |                     |                     |
|--------------------|-----------------------------------|---------------------|---------------------|
|                    | <b>Synthesis</b>                  | <b>Ring Opening</b> | <b>Deprotection</b> |
| Chol-OVDM(DMEN)    | CDCl <sub>3</sub>                 | D <sub>2</sub> O    | -                   |
| Chol-OVDM(BEDA)    | CDCl <sub>3</sub>                 | CDCl <sub>3</sub>   | CH <sub>3</sub> OD  |
| Chol-OVDM(IMID)    | CDCl <sub>3</sub>                 | DMSO-d <sub>6</sub> | -                   |
| Chol-OVDM(BG)      | CDCl <sub>3</sub>                 | CDCl <sub>3</sub>   | CH <sub>3</sub> OD  |

**Table SI 2: Solvents used for dialysis**

| <b>CLOs Series</b> | <b>Dialysis Solvents</b> |
|--------------------|--------------------------|
| Chol-OVDM(DMEN)    | Deionized water          |
| Chol-OVDM(BEDA)    | Acetone                  |
| Chol-OVDM(IMID)    | Methanol                 |
| Chol-OVDM(BG)      | Acetone                  |



**Table SI 3:** Antibacterial and toxicity profile of CLOs against *E. coli* ATCC 25922, *K. pneumoniae* ATCC 700603, *A. baumannii* ATCC 19606, *P. aeruginosa* ATCC 27853, and *S. aureus* ATCC 43300 MRSA.

| CLOs               | MIC                  |                      |                     |                      |                  | Cytotoxicity ( $\mu\text{g/mL}$ ) | Haemolysis           |                  |
|--------------------|----------------------|----------------------|---------------------|----------------------|------------------|-----------------------------------|----------------------|------------------|
|                    | ( $\mu\text{g/mL}$ ) |                      |                     |                      |                  |                                   | ( $\mu\text{g/mL}$ ) |                  |
|                    | <i>E. coli</i>       | <i>K. pneumoniae</i> | <i>A. baumannii</i> | <i>P. aeruginosa</i> | <i>S. aureus</i> | CC <sub>50</sub>                  | HC <sub>10</sub>     | HC <sub>50</sub> |
| Chol-OVDM(DMEN)-5  | >640                 | >640                 | 320                 | >640                 | 640              | 32-126*                           | 4                    | 3-9              |
| Chol-OVDM(DMEN)-10 | >640                 | >640                 | 160                 | >640                 | >640             | 8-86                              | 1                    | 3                |
| Chol-OVDM(DMEN)-15 | >640                 | >640                 | 320                 | >640                 | >640             | 3-103                             | 1                    | 3-5              |
| Chol-OVDM(DMEN)-20 | >640                 | >640                 | >640                | >640                 | >640             | 38-109                            | 1 to 2               | 5-9              |
| Chol-OVDM(DMEN)-25 | >640                 | >640                 | >640                | >640                 | >640             | 5->128*                           | 2 to 3               | 9-33             |
| Chol-OVDM(BEDA)-5  | >640                 | >640                 | >640                | >640                 | >640             | 53->128                           | 5                    | 8-15             |
| Chol-OVDM(BEDA)-10 | >640                 | >640                 | >640                | >640                 | 320              | 8->128*                           | 3                    | 8->128*          |
| Chol-OVDM(IMID)-5  | >640                 | >640                 | >640                | >640                 | >640             | 35->128*                          | 1 to 3               | 126->128         |
| Chol-OVDM(IMID)-10 | >640                 | >640                 | >640                | >640                 | >640             | >128                              | <1                   | >128             |
| Chol-OVDM(BG)-5    | >640                 | >640                 | >640                | >640                 | >640             | >128                              | 79-96                | >128             |
| Chol-OVDM(BG)-10   | >640                 | >640                 | >640                | >640                 | >640             | 125->128                          | 86->128              | 31-120*          |
| Vancomycin         |                      |                      |                     |                      | 0.25             |                                   |                      |                  |
| Tamoxifen          |                      |                      |                     |                      |                  | 5 to 29                           |                      |                  |
| Melittin           |                      |                      |                     |                      |                  |                                   | 1 to 13              | 8                |

**Table SI 4:** Selectivity indices for the CLOs against *C. tropicalis*, *C. glabrata*, *C. deuterigattii* and *C. auris*. The selectivity index is calculated by dividing the HC<sub>10</sub> by the MIC value for a given microbe.

| CLOs               | HC <sub>10</sub><br>(µg/mL) | Selectivity index value |                    |                         |                 |
|--------------------|-----------------------------|-------------------------|--------------------|-------------------------|-----------------|
|                    |                             | <i>C. tropicalis</i>    | <i>C. glabrata</i> | <i>C. deuterigattii</i> | <i>C. auris</i> |
| Chol-OVDM(DMEN)-5  | 4                           | 0.4-3.2                 | 0.05               | 0.0062-0.2              | 0.0062-0.8      |
| Chol-OVDM(DMEN)-10 | 1                           | 0.8-1.58                | 0.025-0.05         | 0.2-0.4                 | 0.0015-12.5     |
| Chol-OVDM(DMEN)-15 | 1                           | 0.8-1.58                | 0.0125-0.025       | 0.2-0.4                 | 0.025-0.4       |
| Chol-OVDM(DMEN)-20 | 1-2                         | 1.58-1.6                | 0.00625            | 0.1-0.2                 | 0.0031-0.1      |
| Chol-OVDM(DMEN)-25 | 2-3                         | 2.4-3.1                 | 0.0093-0.0125      | 0.3-0.4                 | 0.004-0.4       |
| Chol-OVDM(BEDA)-5  | 5                           | 0.25-0.5                | 0.0078-0.015       | 0.007-.125              | 0.007-2         |
| Chol-OVDM(BEDA)-10 | 3                           | 1.2-2.4                 | 0.018              | 0.25-0.3                | 0.004-0.6       |
| Chol-OVDM(IMID)-5  | 1-3                         | 0.6-0.8                 | 0.0093-0.025       | 0.004-0.1               | 0.004-0.2       |
| Chol-OVDM(IMID)-10 | <1                          | 0.8-3.2                 | 0.0062-0.05        | 0.05-0.2                | 0.0015-0.2      |
| Chol-OVDM(BG)-5    | 79-96                       | 0.15-1.9                | 0.15-7.9           | 0.1-0.12                | 0.15-3.95       |

---

|                  |        |          |          |          |          |
|------------------|--------|----------|----------|----------|----------|
| Chol-OVDM(BG)-10 | 86≥128 | 0.8-17.2 | 0.13-0.2 | 0.13-0.2 | 0.2-17.2 |
|------------------|--------|----------|----------|----------|----------|

---

**Table SI 5:** Selectivity indices for the oligomer library against *E. coli*, *K. pneumoniae*, *A. baumannii*, *P. aeruginosa* and *S. aureus*. The selectivity index is calculated by dividing the HC<sub>10</sub> by the MIC value for a given microbe.

| CLOs               | HC <sub>10</sub><br>(µg/mL) | Selectivity index value |                      |                     |                      |                  |
|--------------------|-----------------------------|-------------------------|----------------------|---------------------|----------------------|------------------|
|                    |                             | <i>E. coli</i>          | <i>K. pneumoniae</i> | <i>A. baumannii</i> | <i>P. aeruginosa</i> | <i>S. aureus</i> |
| Chol-OVDM(DMEN)-5  | 4                           | >0.006                  | >0.006               | 0.013               | >0.006               | 0.006            |
| Chol-OVDM(DMEN)-10 | 1                           | >0.002                  | >0.002               | 0.006               | >0.002               | >0.002           |
| Chol-OVDM(DMEN)-15 | 1                           | >0.002                  | >0.002               | 0.003               | >0.002               | >0.002           |
| Chol-OVDM(DMEN)-20 | 1-2                         | >0.001-0.003            | >0.001-0.003         | >0.001-0.003        | >0.001-0.003         | >0.001-0.003     |
| Chol-OVDM(DMEN)-25 | 2-3                         | >0.003-0.004            | >0.003-0.004         | >0.003-0.004        | >0.003-0.004         | >0.003-0.004     |
| Chol-OVDM(BEDA)-5  | 5                           | >0.008                  | >0.008               | >0.008              | >0.008               | >0.008           |
| Chol-OVDM(BEDA)-10 | 3                           | >0.005                  | >0.005               | >0.005              | >0.005               | 0.009            |
| Chol-OVDM(IMID)-5  | 1-3                         | >0.001-0.004            | >0.001-0.004         | >0.001-0.004        | >0.001-0.004         | >0.001-0.004     |
| Chol-OVDM(IMID)-10 | <1                          | >0.002                  | >0.002               | >0.002              | >0.002               | >0.002           |
| Chol-OVDM(BG)-5    | 79-96                       | >0.12-0.15              | >0.12-0.15           | >0.12-0.15          | >0.12-0.15           | >0.12-0.15       |
| Chol-OVDM(BG)-10   | 86≥128                      | >0.13-0.2               | >0.13-0.2            | >0.13-0.2           | >0.13-0.2            | >0.13-0.2        |
